# Supplementary material for: Behaviors, symptoms, and outcomes of North American patients with autoimmune hepatitis during the COVID-19 pandemic
Source: HighWire-hosted journal article supplement (doi:10.1136/jim-2021-001871), 2021-07-27
Supplement: jim-2021-001871supp001_data_supplement.pdf [file jim-2021-001871supp001_data_supplement.pdf]

**Supplemental Table 1: Impact of COVID-19 Pandemic on AIH patients survey**

- How old are you?
- What is your gender?
- What is your ethnicity?
- Are you currently living in the United States?
- What state do you currently live in?
- What is your gross household income per year
- What is the highest level of education you have completed?
- Have you been diagnosed with autoimmune hepatitis (AIH) by a medical doctor?
- At what age were you diagnosed with AIH?
- If you have ever had a liver biopsy, what was the severity of the liver scarring (fibrosis) reported on your MOST RECENT liver biopsy (if you have ever had more than one)?
- What immunosuppressant medications are you CURRENTLY TAKING for the treatment of AIH?
- What immunosuppressant medications have you taken IN THE PAST and are NOT CURRENTLY TAKING for the treatment of AIH?
- Have you ever had a liver transplantation for the treatment of AIH?
- During the past month, did you adhere to your state's guidelines for social distancing and stay at home orders?
- Did your doctor make any adjustments to your immunosuppressive medication IN ANTICIPATION of the coronavirus pandemic in the month prior or during the coronavirus pandemic?
- In the months PRIOR to the coronavirus pandemic, did you maintain a consistent job for which you are paid?
- If yes, did your work PRIOR to the coronavirus pandemic involve interaction with coworkers OR customers?
- Have you maintained work with this employer during the last 4 weeks (during the coronavirus pandemic)?
- If yes, does your job during the coronavirus pandemic put you in close and repeated contact with others (employees or customers)?
- If yes, during the past month, did any contacts at work have any symptoms that could be consistent with infection with the coronavirus or a positive coronavirus test? (dry cough, fever, shortness of breath, etc.)
- Did your employer allow you to work from home?
- Were you fired, furloughed, or placed on extended leave from work due to the coronavirus pandemic?
- Did you quit your job because of the coronavirus pandemic?
- Is your job in a healthcare setting, where you could possibly participate in the care of individuals with known coronavirus infection?
- Did you request a change in job function because of your underlying illness or medications?
- If yes, was this supported by your employer?
- During the past month have you had symptoms that could be consistent with infection with the coronavirus? (dry cough, fever, shortness of breath, etc.)
- If yes, did you alert your treating doctor?
- If yes, did your treating doctor tell you to self-quarantine because you had symptoms of coronavirus infection? (dry cough, fever, shortness of breath, etc.)
- As well as, did your treating doctor provide an order/request to test for coronavirus?
- If yes, were the results positive?
- If positive, were the medications used for the treatment of AIH reduced/adjusted by your treating doctor?
- If yes, name of medication(s) adjusted:
- Were you hospitalized for the treatment of symptoms associated with the coronavirus?
- During the past month have any members of your household had any symptoms that could be consistent with infection with the coronavirus? (dry cough, fever, shortness of breath, etc.)
- If yes, did they alert their treating doctor?
- If yes, did their treating doctor tell them to self-quarantine because they had symptoms of coronavirus? (dry cough, fever, etc)
- If yes, were the results positive?

- During the past month, were you due to have routine testing or labs collected for the management of AIH?
- If yes, were these tests canceled, extended, or rescheduled due to the coronavirus pandemic?
- Please identify which following risk factors for severe COVID-19 about you are true.
- When your state guidelines for social distancing and stay at home orders are relaxed, what plans are you contemplating to protect yourself in the 6 months beyond?
- Do you think a coronavirus test (THAT DETECTS ACTIVE VIRAL INFECTION) without the need for a physician order would make it easier for you to go back to work or return back to your physical community?
- If yes, how often would you need a coronavirus test to be completed to minimize your worry?
- Do you think a coronavirus test (THAT SHOWS IF YOU HAVE BEEN EXPOSED AND ARE IMMUNE) without the need for a physician order would make it easier for you to go back to work or return back to your physical community?
- Did you have any symptoms that you associate with AIH 3 months PRIOR to the start of the coronavirus pandemic?
- Did your perceived symptoms change during the coronavirus pandemic?

**Supplemental Table 2:** Description of the three autoimmune hepatitis patients hospitalized for COVID-19 illness. All patient had confirmation with SARS-CoV-2 testing.

| Hospitalized patient with COVID-19 symptoms | Patient characteristics                              | Current AIH treatment regimen          | Comorbidities other than immune suppression medications  | Adhered to stay at home orders | Maintained job during pandemic | Work contacts with COVID-19 symptoms | Home contacts with COVID-19 symptoms | Medications adjusted during COVID-19 |
|---------------------------------------------|------------------------------------------------------|----------------------------------------|----------------------------------------------------------|--------------------------------|--------------------------------|--------------------------------------|--------------------------------------|--------------------------------------|
| <b>Patient #1</b>                           | Adult Caucasian female woman with stage 3 fibrosis   | AZA                                    | HTN                                                      | Yes                            | No                             | N/A                                  | Yes                                  | No                                   |
| <b>Patient #2</b>                           | Adult Caucasian woman with unknown level of fibrosis | prednisone, MMF, tacrolimus            | HTN, DM2, BMI >40 kg/m <sup>2</sup>                      | Yes                            | Yes                            | No                                   | No                                   | MMF, tacrolimus                      |
| <b>Patient #3</b>                           | Adult African American woman with stage 3 fibrosis   | prednisone, AZA, tacrolimus, rituximab | Asthma, DM2, BMI >40 kg/m <sup>2</sup> , African descent | Yes                            | No                             | N/A                                  | Yes                                  | Prednisone, tacrolimus               |
